# Supplementary material for: Self-Assembled Chitosan/Dialdehyde Carboxymethyl Cellulose Hydrogels: Preparation and Application in the Removal of Complex Fungicide Formulations from Aqueous Media
Source: MDPI journal article supplement (doi:10.3390/polym15173496), 2023-08-22
Supplement: s1 [file s1]

## SUPPLEMENTARY MATERIAL

# Self-Assembled Chitosan/Dialdehyde Carboxymethyl Cellulose Hydrogels: Preparation and Application in the Removal of Complex Fungicide Formulations from Aqueous Media

Claudiu-Augustin Ghiorghita, Maria Marinela Lazar, Luminita Ghimici and Maria Valentina Dinu \*

“Petru Poni” Institute of Macromolecular Chemistry, Grigore Ghica Voda Alley 41 A, 700487 Iasi, Romania; claudiu.ghiorghita@icmpp.ro (C.-A.G.); maria.lazar@icmpp.ro (M.M.L.); lghimici@icmpp.ro (L.G.)

\* Correspondence: vdinu@icmpp.ro

Figure S1. Conductometric titration profiles of the non-oxidized and oxidized CMC1 and CMC2.

Figure S2. FTIR spectra of DA-CMC2.2 and DA-CMC2.3.

Figure S3. Optical images of CS/CMC2 and CS/DA-CMC2.3 hydrogels prepared at 1:1 wt. ratio.

Figure S4. FTIR spectra of CS/CMC2 PEC sponges prepared at different weight ratios.

Table S1.  $\text{NH}_2/\text{COOH}$  and  $\text{NH}_2/\text{C=O}$  molar ratio as a function of hydrogels composition.

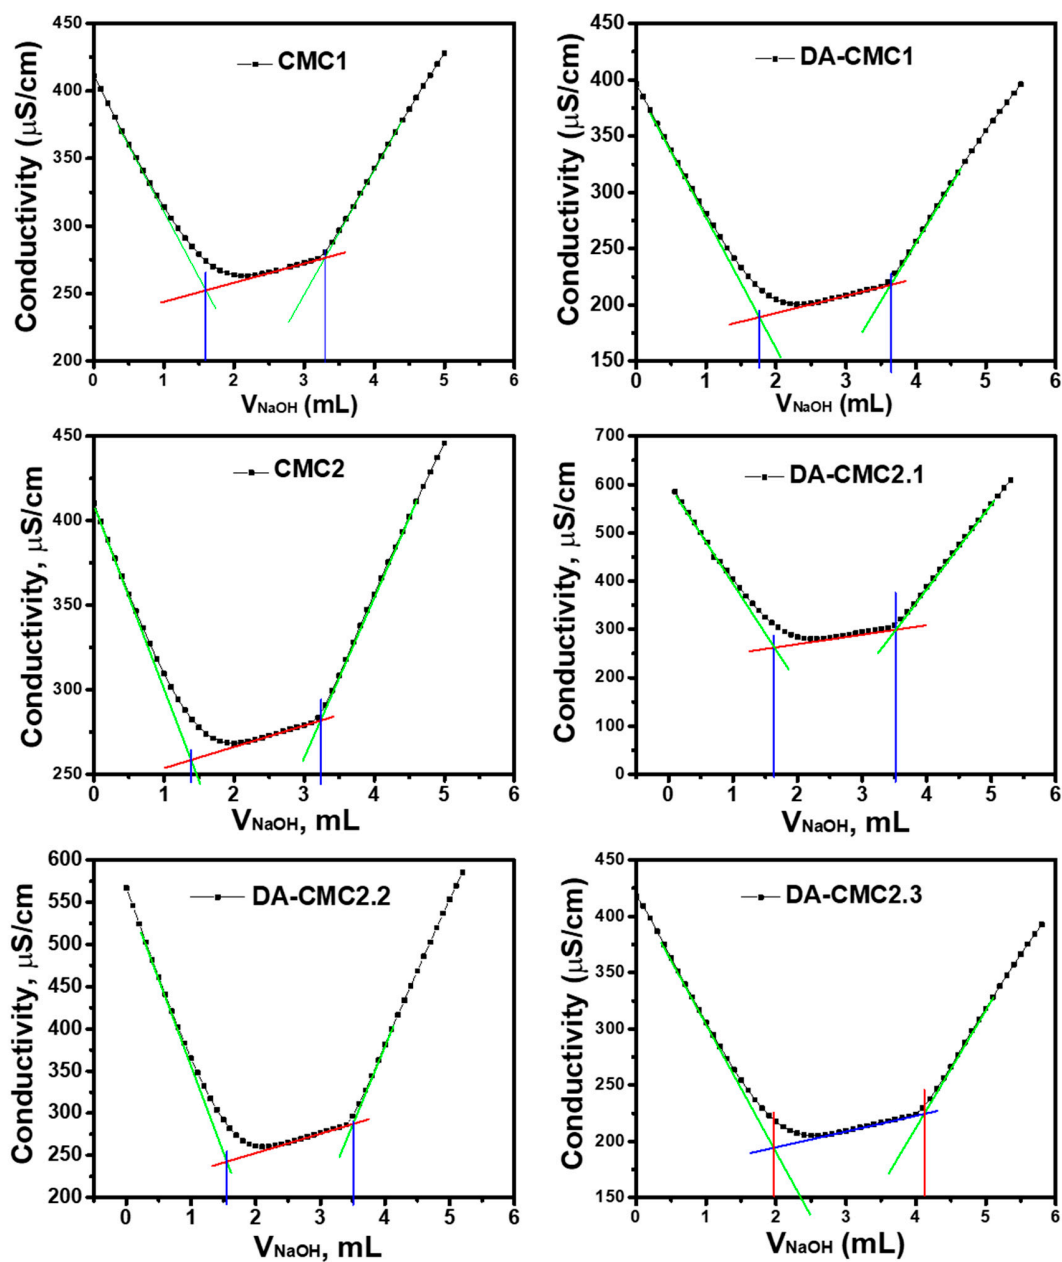

Figure S1. Conductometric titration profiles of the non-oxidized and oxidized CMC1 and CMC2.

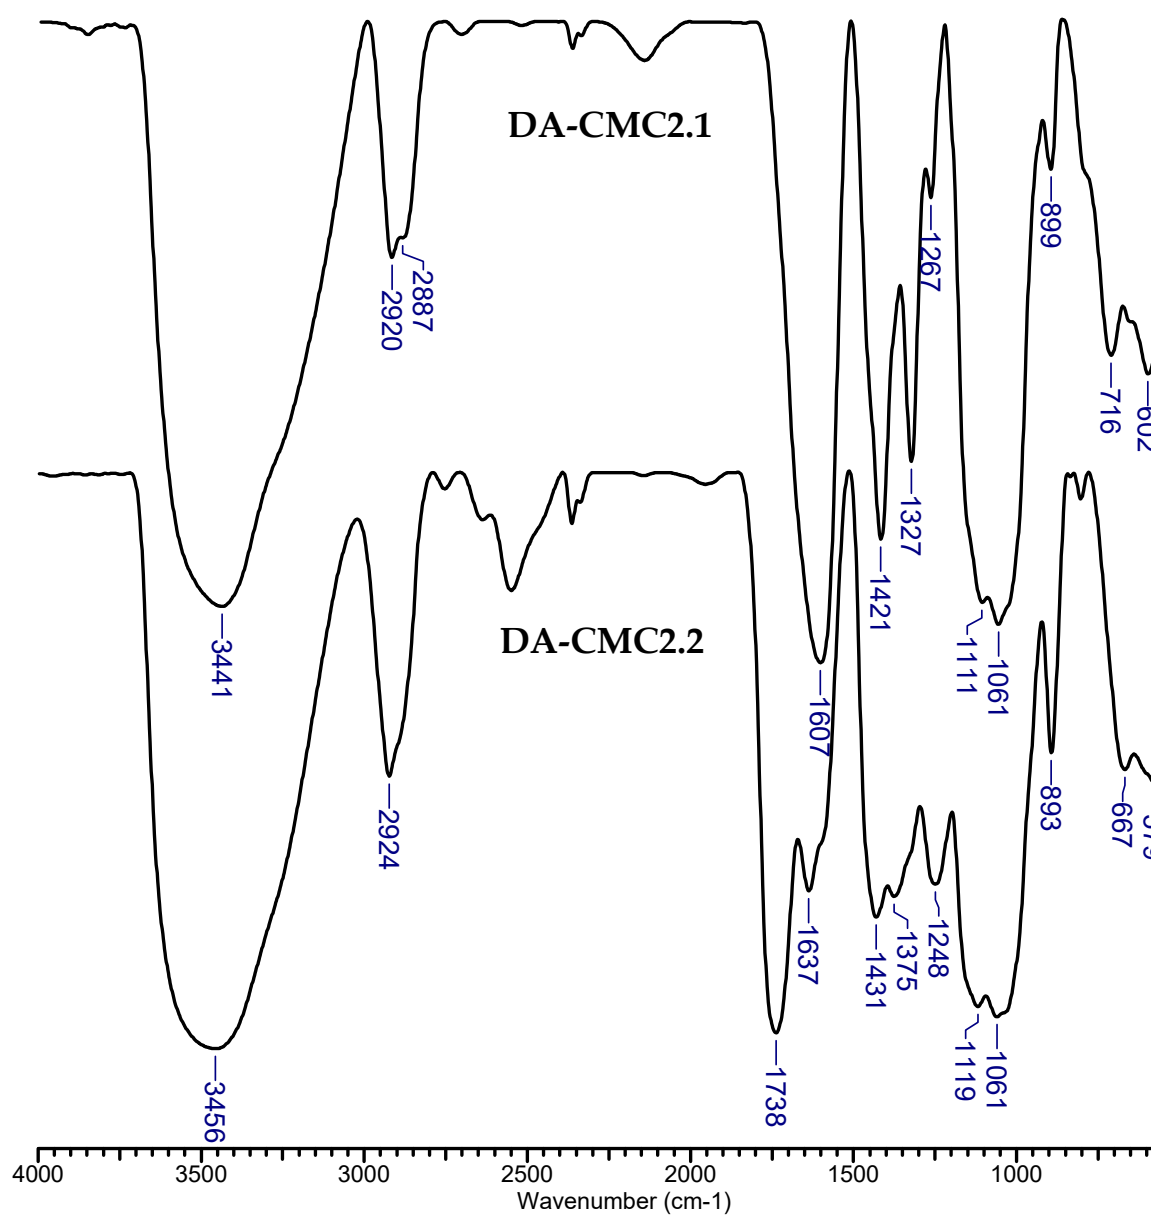

Figure S2. FTIR spectra of DA-CMC2.2 and DA-CMC2.3.

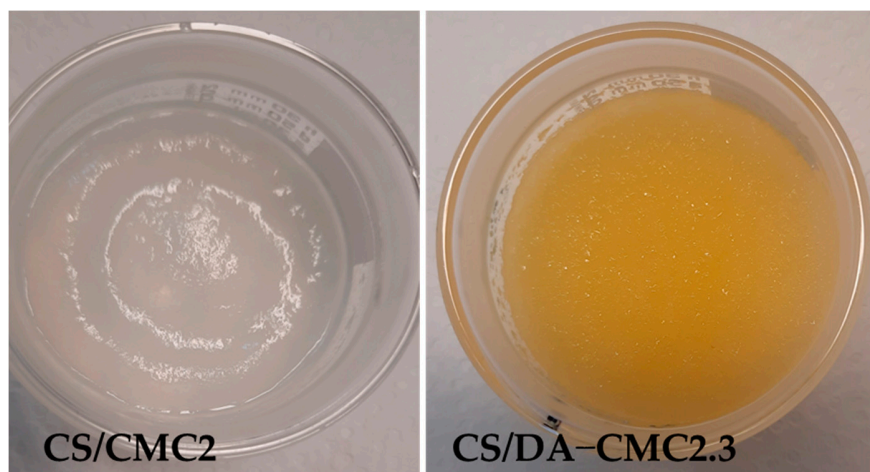

Figure S3. Optical images of CS/CMC2 and CS/DA-CMC2.3 hydrogels prepared at 1:1 wt. ratio.

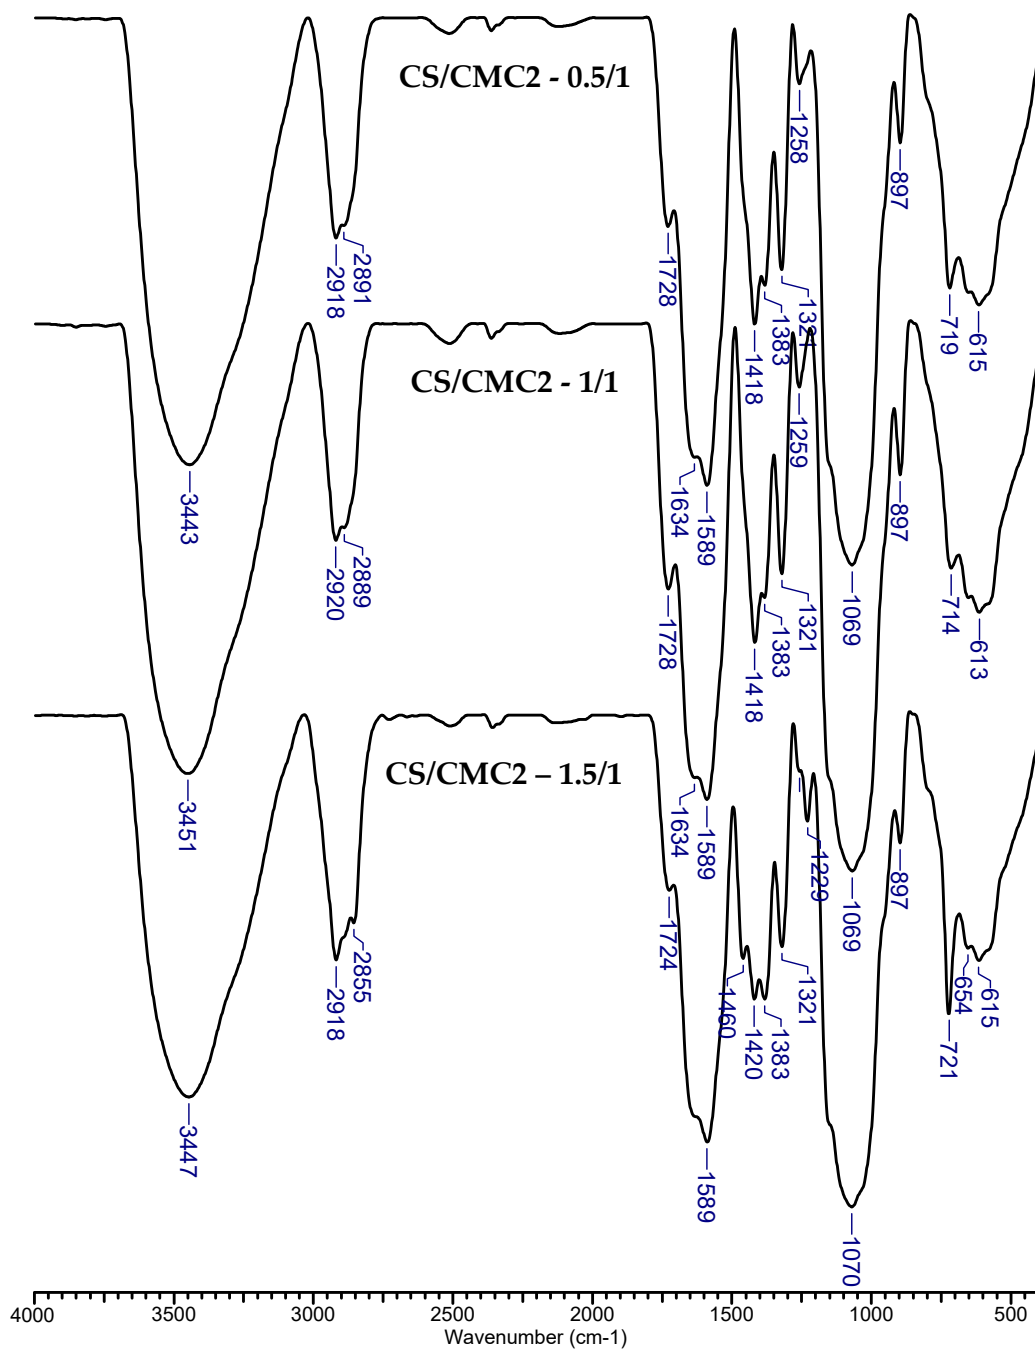

Figure S4. FTIR spectra of CS/CMC2 PEC sponges prepared at different weight ratios.

**Table S1.** NH<sub>2</sub>/COOH and NH<sub>2</sub>/C=O molar ratio as a function of hydrogels composition.

| PEC                  | Molar ratio           |                      |
|----------------------|-----------------------|----------------------|
|                      | NH <sub>2</sub> /COOH | NH <sub>2</sub> /C=O |
| CS/CMC1 – 0.5/1      | 0.65                  | -                    |
| CS/CMC1 – 1/1        | 1.30                  | -                    |
| CS/CMC1 – 1.5/1      | 1.95                  | -                    |
| CS/DA-CMC1           | 1.16                  | 0.78                 |
| CS/CMC2 – 0.5/1      | 0.59                  | -                    |
| CS/CMC2 – 1/1        | 1.18                  | -                    |
| CS/CMC2 – 1.5/1      | 1.76                  | -                    |
| CS/DA-CMC2.1 – 1.1   | 1.16                  | 0.25                 |
| CS/DA-CMC2.2 – 1.1   | 1.14                  | 0.44                 |
| CS/DA-CMC2.3 – 0.5/1 | 0.51                  | 1.29                 |
| CS/DA-CMC2.3 – 1/1   | 1.01                  | 0.65                 |
| CS/DA-CMC2.3 – 1.5/1 | 1.52                  | 0.43                 |
